# Supplementary material for: Isolation and structure of a silicocationic species with 1,3-aryl bridging between silicon atoms: a bis-silylated benzenium ion or a bridging Ph group?
Source: Royal Society of Chemistry journal article supplement (doi:10.1039/b513203g), 2005-01-01

**Title : Isolation and structure of a silicocationic species with 1,3-aryl bridging between silicon atoms: a bis-silylated benzenium ion or a bridging Ph group?**

**Nicholas Choi,<sup>a</sup> Paul D. Lickiss,<sup>\*b</sup> Mary McPartlin,<sup>a</sup> Phindile C. Masangane,<sup>b‡</sup> and Guilaine L. Veneziani<sup>b</sup>**

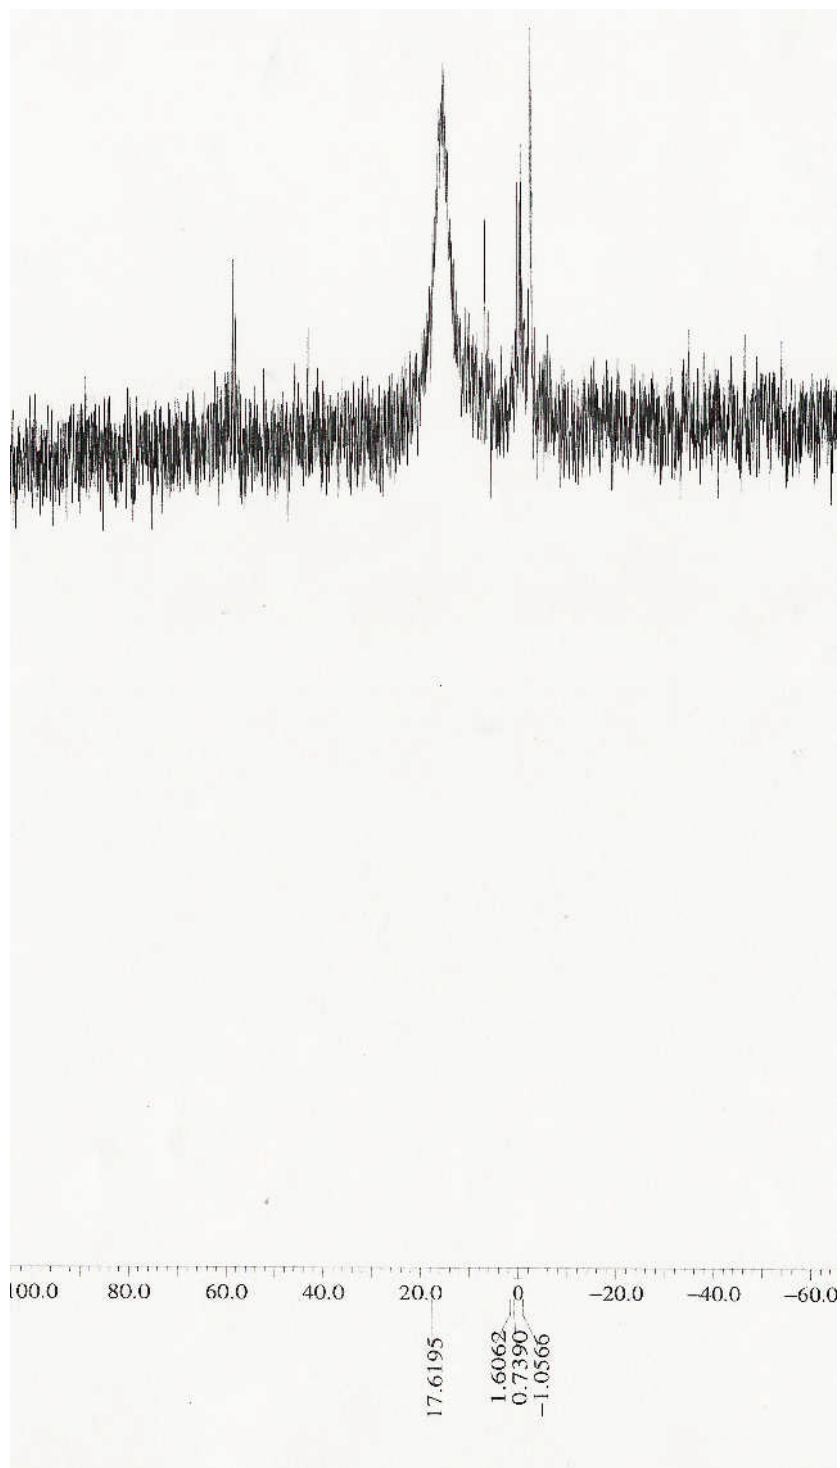

$^{29}\text{Si}$  NMR spectrum of reaction mixture from  $(\text{Me}_3\text{Si})_3\text{CSiPhMeH}$  +  $\text{Ph}_3\text{C}[\text{B}(\text{C}_6\text{F}_5)_4]$  at room temperature.

$^{29}\text{Si}$  NMR spectrum of reaction mixture from  $(\text{Me}_3\text{Si})_3\text{CSiPhMeH} + \text{Ph}_3\text{C}[\text{B}(\text{C}_6\text{F}_5)_4]$  at 333 K.

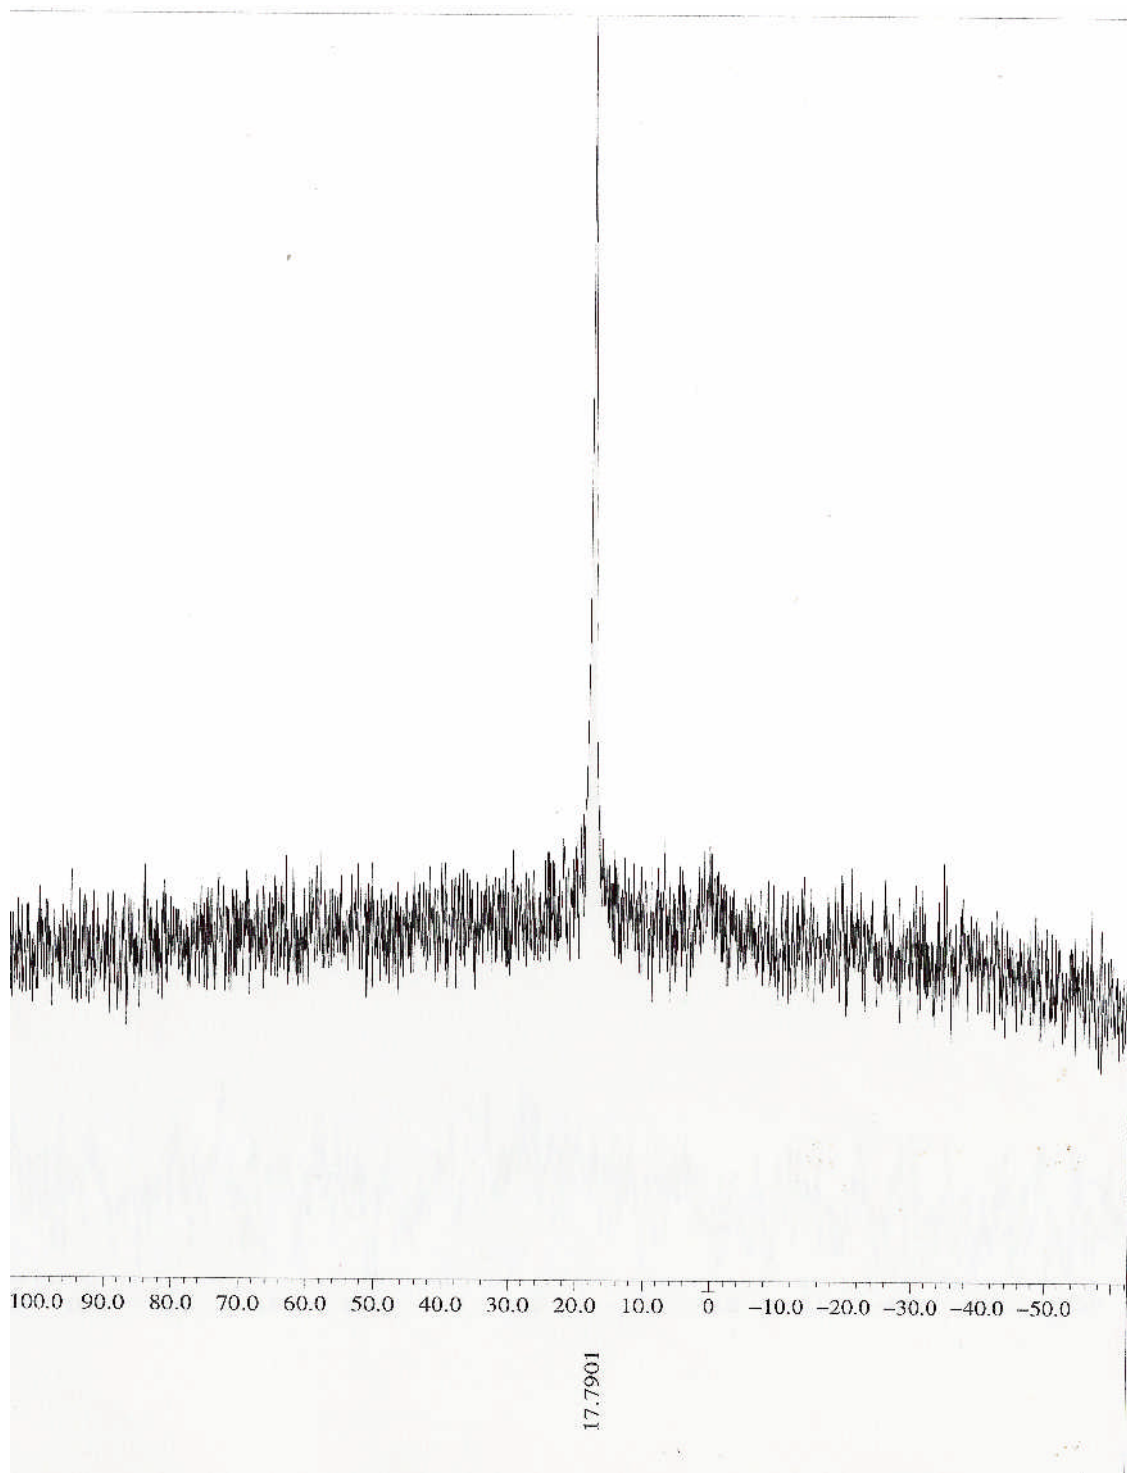

Supplement: b513203g.pdf [file b513203g.pdf]
